# Supplementary material
Source: PubMed Central journal article supplement (PMC7055698)
Supplement: rcmb.2019-0004OC_parikh_data_supplement.pdf [file rcmb.2019-0004OC_parikh_data_supplement.pdf]

## Rhinovirus C15 Induces Airway Hyperresponsiveness Via Calcium Mobilization in Airway Smooth Muscle

Vishal Parikh<sup>1</sup>, Jacqueline Scala<sup>1</sup>, Riva Patel<sup>1</sup>, Corinne Corbi<sup>1</sup>, Dennis Lo<sup>1</sup>, Yury A. Bochkov<sup>2</sup>, Joshua L. Kennedy<sup>3</sup>, Richard C. Kurten<sup>4</sup>, Stephen B. Liggett<sup>5</sup>, James E. Gern<sup>2</sup>, and Cynthia J. Koziol-White<sup>1\*</sup>

Online Supplemental Data File

| Table S1 – Donor Demographics |               |                                   |
|-------------------------------|---------------|-----------------------------------|
| <b>hPCLS studies</b>          |               |                                   |
| <u>Age</u>                    | <u>Gender</u> | <u>Ethnicity</u>                  |
| 49                            | F             | Caucasian                         |
| 20                            | F             | Caucasian                         |
| 27                            | M             | American Indian or Alaskan Native |
| 38                            | F             | Caucasian                         |
| 38                            | M             | Caucasian                         |
| 38                            | F             | Caucasian                         |
| <b>HASM/HAEC</b>              |               |                                   |
| <u>Age</u>                    | <u>Gender</u> | <u>Ethnicity</u>                  |
| 28                            | M             | Hispanic                          |
| 17                            | F             | Caucasian                         |
| 26                            | M             | African American                  |
| 22                            | M             | Caucasian                         |
| 14                            | M             | Caucasian                         |
| 16                            | M             | Caucasian                         |

**Table S1 – Demographics of lung donors from which hPCLS, HAEC, and HASM were derived.**

| <b>Table S2 – Mediator analysis of Pro-contractile Sensitizers</b> |              |                             |                                            |
|--------------------------------------------------------------------|--------------|-----------------------------|--------------------------------------------|
| <u>Inflammatory Mediator</u>                                       | <u>Donor</u> | <u>Detected at baseline</u> | <u>Detected following RV-C15 infection</u> |
| <b>TNF<math>\alpha</math></b>                                      | 1            | Y                           | Y (0.72 fold compared to baseline)         |
|                                                                    | 2            | N                           | N                                          |
|                                                                    | 3            | N                           | N                                          |
|                                                                    | 4            | N                           | N                                          |
| <b>IL-33</b>                                                       | 1            | N                           | N                                          |
|                                                                    | 2            | N                           | N                                          |
|                                                                    | 3            | N                           | N                                          |
|                                                                    | 4            | N                           | N                                          |
| <b>IL-1<math>\beta</math></b>                                      | 1            | N                           | N                                          |
|                                                                    | 2            | N                           | N                                          |
|                                                                    | 3            | N                           | N                                          |
|                                                                    | 4            | N                           | N                                          |
| <b>TGF<math>\beta</math></b>                                       | 1            | N                           | N                                          |
|                                                                    | 2            | N                           | N                                          |
|                                                                    | 3            | N                           | N                                          |
|                                                                    | 4            | N                           | N                                          |
| <b>IL-13</b>                                                       | 1            | N                           | N                                          |
|                                                                    | 2            | N                           | N                                          |
|                                                                    | 3            | N                           | N                                          |
|                                                                    | 4            | N                           | N                                          |

**Table S2 – Mediator analysis of “pro-contractile sensitizers” release following RV-C15 stimulation of hPCLS or HAEC.**

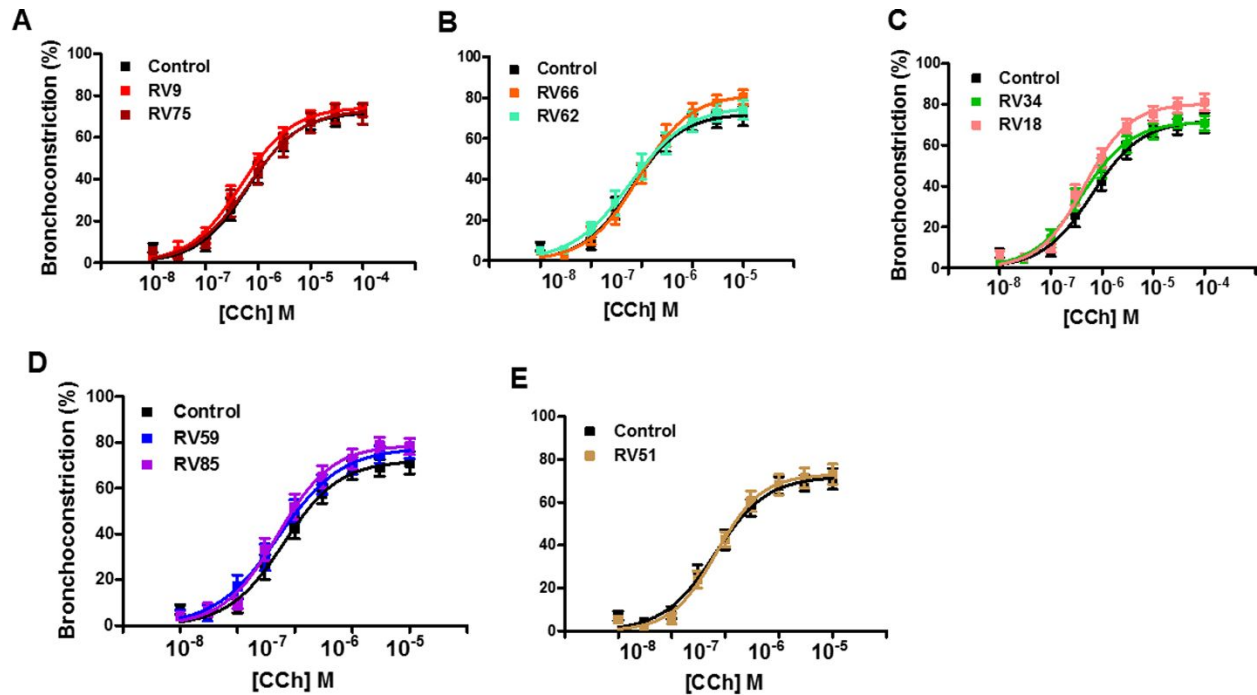

**Figure S1 – Exposure of human small airways to RVA strains does not significantly increase airway reactivity to carbachol.** hPCLS were infected with RV-A strains (75, 9, 18, 34, 59, 85, 66, 62, or 51;  $10^5$  Pfu for 48 hr). The slices were subjected to a carbachol dose response ( $10^{-8}$  –  $10^{-4}$  M), then bronchoconstriction was plotted as sigmoidal dose response curves of % constriction versus increasing concentration of carbachol (n=8 separate lung donors with 3 slices/condition for each donor). Two-tailed unpaired t-tests comparing each condition to control buffer were performed, as well as a two way ANOVA.

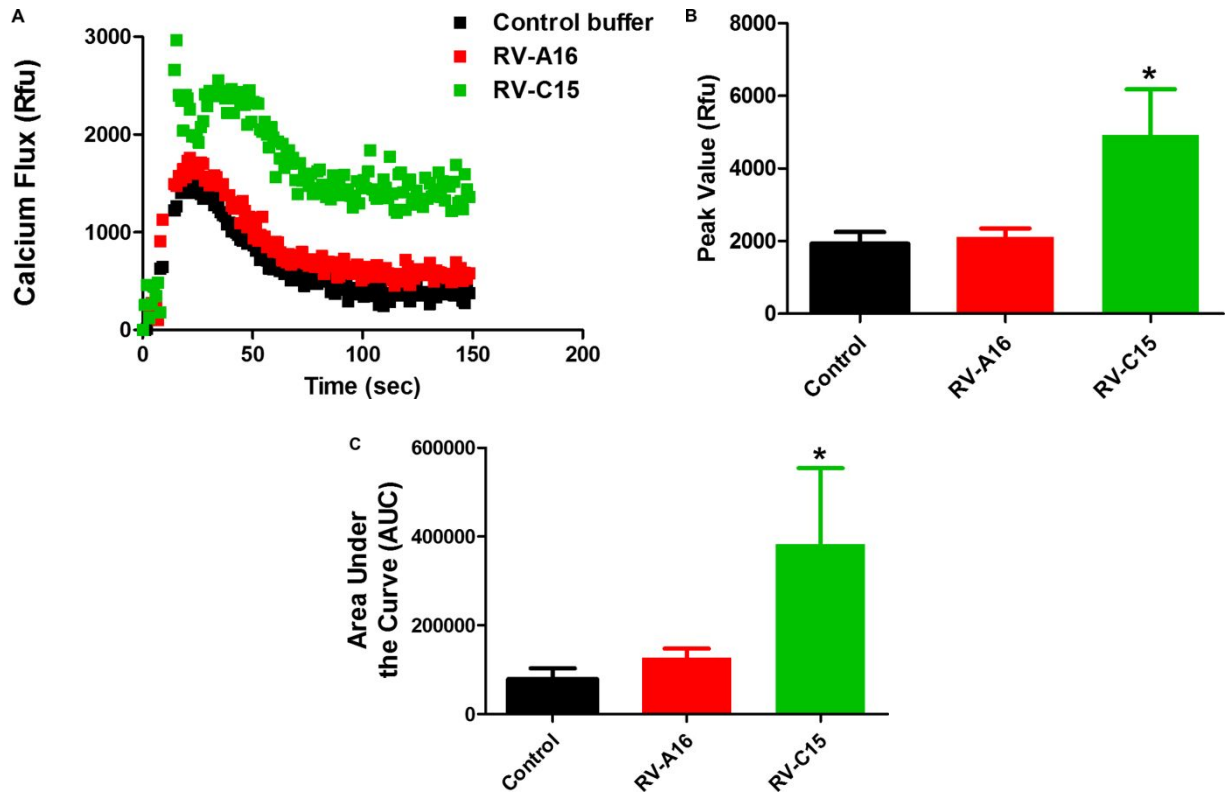

**Figure S2 – ALI-differentiated HAEC exposed to RVC, but not RVA, induce a marked increase in  $[Ca^{2+}]_i$  in co-cultured HASM. HAEC were exposed to RVA ( $10^6$  Pfu, 48 hr) co-cultured with HASM. (A)  $[Ca^{2+}]_i$  flux to Cch was measured using Fluo-8 over 120 sec. (B) Peak  $[Ca^{2+}]_i$  and (C) area under the curve were calculated for triplicate wells for 4 separate HASM cell donors and plotted as mean  $\pm$  standard error. Two-tailed paired t-tests comparing each condition to control buffer were performed, as was two way ANOVA.**

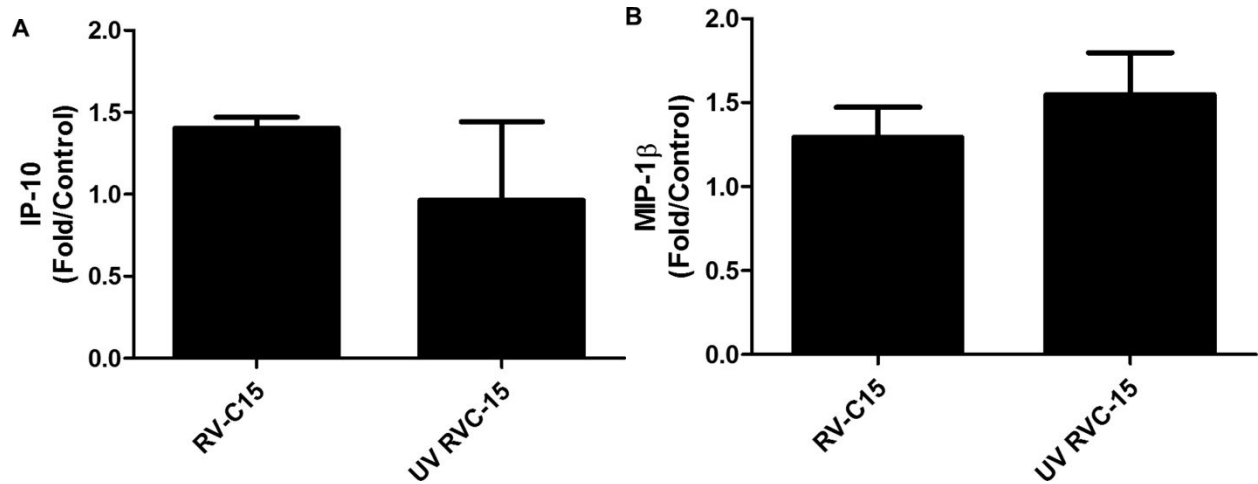

**Figure S3 – Exposure of ALI-differentiated HAEC to RV-C15, or UV inactivated RV-C15, induce similar levels of mediator release.** Fold induction of IP-10 (A) or MIP1 $\beta$  (B) release relative to control buffer stimulation was compared following exposure to either RV-C15 or UV inactivated RV-C15 ( $10^6$  Pfu, 48 hr). n=3 donors with data plotted as mean  $\pm$  standard error. No statistical significance between RVC treatments was observed. Two-tailed paired t-tests comparing each condition to control buffer were performed, as was two way ANOVA.
